# Supplementary material for: k-mer manifold approximation and projection for visualizing DNA sequences
Source: Genome Res. 2025 May;35(5):1234–46. doi: 10.1101/gr.279458.124 (PMC12047656; doi:10.1101/gr.279458.124)
Supplement: Supplement 6 [file Supplemental_Tables.xlsx]

## Sheet: List of Tables
List of Supplemental Tables
Table S1: EWS data sources
Table S2: Motif proportions in enhancers in 4 pairs

## Sheet: Table S1
Table S1: EWS data sources
Sample ID	Cell line	Anti-body	Treatment	Replicate	detail
GSM5775774	Parental A673 cells	ETV6	-	-	GSM5775774: Parental A673 cell line - ETV6 CUT&Tag with Sigma anti-body replicate 2; Homo sapiens; OTHER
GSM5775775	Parental A673 cells	Input DNA For ETV6	-	-	GSM5775775: Parental A673 cell line - CUT&Tag input DNA control replicate 1; Homo sapiens; OTHER
GSM5505994	Parental A673 cells	FLI1	-	-	GSM5505994: Parental A673 cell line - FLI1 ChIP-seq; Homo sapiens; ChIP-Seq
GSM5505995	Parental A673 cells	Input DNA For FLI1	-	-	GSM5505995: Parental A673 cell line - input DNA reference for A673 FLI1 sample; Homo sapiens; ChIP-Seq
GSM5775783	A673 ETV6 dTAG cells	ETV6	dTAGv-1	-	GSM5775783: A673 ETV6 dTAG cells - 24 hour dTAGV-1 treated - ETV6 HA-tag CUT&Tag with CST anti-body replicate 1; Homo sapiens; OTHER
GSM5775787	A673 ETV6 dTAG cells	Input DNA For ETV6	dTAGv-1	-	GSM5775787: A673 ETV6 dTAG cells - 24 hour dTAGV-1 treated - CUT&Tag input DNA control replicate 1; Homo sapiens; OTHER
GSM5506006	A673 ETV6 dTAG cells	FLI1	dTAGv-1	-	GSM5506006: A673 ETV6 dTAG cells - 6 hour dTAGV-1 treated - FLI1 ChIP-seq - replicate 1; Homo sapiens; ChIP-Seq
GSM5506014	A673 ETV6 dTAG cells	Input DNA For FLI1	dTAGv-1	-	GSM5506014: A673 ETV6 dTAG cells - 6 hour dTAGV-1 treated - input DNA reference - replicate 1; Homo sapiens; ChIP-Seq
GSM5506008	A673 ETV6 dTAG cells	H3K27ac	DMSO	1	GSM5506008: A673 ETV6 dTAG cells - 6 hour DMSO treated - H3K27ac ChIP-seq - replicate 1; Homo sapiens; ChIP-Seq
GSM5506012	A673 ETV6 dTAG cells	Input DNA for H3K27ac	DMSO	1	GSM5506012: A673 ETV6 dTAG cells - 6 hour DMSO treated - input DNA reference - replicate 1; Homo sapiens; ChIP-Seq
GSM5506009	A673 ETV6 dTAG cells	H3K27ac	DMSO	2	GSM5506009: A673 ETV6 dTAG cells - 6 hour DMSO treated - H3K27ac ChIP-seq - replicate 2; Homo sapiens; ChIP-Seq
GSM5506013	A673 ETV6 dTAG cells	Input DNA for H3K27ac	DMSO	2	GSM5506013: A673 ETV6 dTAG cells - 6 hour DMSO treated - input DNA reference - replicate 2; Homo sapiens; ChIP-Seq
GSM5506010	A673 ETV6 dTAG cells	H3K27ac	dTAGv-1	1	GSM5506010: A673 ETV6 dTAG cells - 6 hour dTAGV-1 treated - H3K27ac ChIP-seq - replicate 1; Homo sapiens; ChIP-Seq
GSM5506014	A673 ETV6 dTAG cells	Input DNA H3K27ac	dTAGv-1	1	GSM5506014: A673 ETV6 dTAG cells - 6 hour dTAGV-1 treated - input DNA reference - replicate 1; Homo sapiens; ChIP-Seq
GSM5506011	A673 ETV6 dTAG cells	H3K27ac	dTAGv-1	2	GSM5506011: A673 ETV6 dTAG cells - 6 hour dTAGV-1 treated - H3K27ac ChIP-seq - replicate 2; Homo sapiens; ChIP-Seq
GSM5506015	A673 ETV6 dTAG cells	Input DNA H3K27ac	dTAGv-1	2	GSM5506015: A673 ETV6 dTAG cells - 6 hour dTAGV-1 treated - input DNA reference - replicate 2; Homo sapiens; ChIP-Seq
GSM5506020	EW8 ETV6 dTAG cells	H3K27ac	DMSO	1	GSM5506020: EW8 ETV6 dTAG cells - 6 hour DMSO treated - H3K27ac ChIP-seq - replicate 1; Homo sapiens; ChIP-Seq
GSM5506021	EW8 ETV6 dTAG cells	H3K27ac	DMSO	2	GSM5506021: EW8 ETV6 dTAG cells - 6 hour DMSO treated - H3K27ac ChIP-seq - replicate 2; Homo sapiens; ChIP-Seq
GSM5506024	EW8 ETV6 dTAG cells	Input DNA H3K27ac	DMSO	-	GSM5506024: EW8 ETV6 dTAG cells - 6 hour DMSO treated - input DNA reference; Homo sapiens; ChIP-Seq
GSM5506022	EW8 ETV6 dTAG cells	H3K27ac	dTAGv-1	1	GSM5506022: EW8 ETV6 dTAG cells - 6 hour dTAGV-1 treated - H3K27ac ChIP-seq - replicate 1; Homo sapiens; ChIP-Seq
GSM5506023	EW8 ETV6 dTAG cells	H3K27ac	dTAGv-1	2	GSM5506023: EW8 ETV6 dTAG cells - 6 hour dTAGV-1 treated - H3K27ac ChIP-seq - replicate 2; Homo sapiens; ChIP-Seq
GSM5506025	EW8 ETV6 dTAG cells	Input DNA H3K27ac	dTAGv-1	-	GSM5506025: EW8 ETV6 dTAG cells - 6 hour dTAGV-1 treated - input DNA reference Homo sapiens; ChIP-Seq
Figure 4A	Name	Sample	Description
	FLI1-WT	GSM5505994 GSM5505995	A673 Parental cell -input DNA control ChIP-Seq A673 Parental cell -FLI1 ChIP-Seq
	FLI1-KO	GSM5506006 GSM5506014	A673 ETV6 dTAG cells - dTAGv−1 treatment-input DNA control A673 ETV6 dTAG cells - dTAGv−1 treatment -FLI1
	ETV6-WT	GSM5775774 GSM5775775	A673 Parental cell -input DNA control A673 Parental cell -ETV6
	ETV6-KO	GSM5775783 GSM5775787	A673 ETV6 dTAG cells - dTAGv−1 treatment-input DNA control A673 ETV6 dTAG cells - dTAGv−1 treatment -ETV6
Figure 4C/4E	Name	Sample	Description
	A673_dTAG_pair1	GSM5506008 GSM5506012 GSM5506010 GSM5506014	A673 ETV6 dTAG cells -DMSO treated - H3K27ac ChIP-seq - replicate 1 A673 ETV6 dTAG cells -DMSO treated - nput DNA control - replicate 1 A673 ETV6 dTAG cells -dTAGv−1-treated - H3K27ac ChIP-seq - replicate 1 A673 ETV6 dTAG cells -dTAGv−1- treated - nput DNA control - replicate 1
	A673_dTAG_pair2	GSM5506009 GSM5506013 GSM5506011 GSM5506015	A673 ETV6 dTAG cells -DMSO treated - H3K27ac ChIP-seq - replicate 2 A673 ETV6 dTAG cells -DMSO treated - nput DNA control - replicate 2 A673 ETV6 dTAG cells -dTAGv−1-treated - H3K27ac ChIP-seq - replicate 2 A673 ETV6 dTAG cells -dTAGv−1- treated - nput DNA control - replicate 2
	EW8_dTAG_pair1	GSM5506020 GSM5506024 GSM5506022 GSM5506025	EW8 ETV6 dTAG cells -DMSO treated - H3K27ac ChIP-seq - replicate 1 EW8 ETV6 dTAG cells -DMSO treated - nput DNA control EW8 ETV6 dTAG cells -dTAGv−1-treated - H3K27ac ChIP-seq - replicate 1 EW8 ETV6 dTAG cells -dTAGv−1- treated - nput DNA control
	EW8_dTAG_pair2	GSM5506021 GSM5506024 GSM5506023 GSM5506025	EW8 ETV6 dTAG cells -DMSO treated - H3K27ac ChIP-seq - replicate 2 EW8 ETV6 dTAG cells -DMSO treated - nput DNA control EW8 ETV6 dTAG cells -dTAGv−1-treated - H3K27ac ChIP-seq - replicate 2 EW8 ETV6 dTAG cells -dTAGv−1- treated - nput DNA control

## Sheet: Table S2
Table S2: Motif proportions in enhancers in 4 pairs
Pair (enhancer regions)	BACH1 (CTCAGCCTCC)	OTX2 (ATCCCAGC)	FLI1 (GGAA repeats）	CCCAGGCTGGAGTGC	KNCH2/ERG1 (CA repeats）	Number of enhancer regions
A673_dTAG_pair1	76.5	NA	78.7	72.3	38.5	80707
A673_dTAG_pair2	74.6	61.2	NA	69.1	35.4	72059
EW8_dTAG_pair1	73.3	60.5	71	NA	34.9	46041
EW8_dTAG_pair2	76.4	77	77.8	72.3	37.6	59044
Average	75.2	66.2333	75.8333	71.2333	36.6	64462.8
Numbers indicate percentages of enhancer regions containing the given motif
